# Supplementary material for: Saturated and stabilized white electroluminescence with simultaneous three-color emission from a six-armed star-shaped single-polymer system
Source: Royal Society of Chemistry journal article supplement (doi:10.1039/c5py01480h), 2015-01-01
Supplement: c5py01480h1.pdf [file c5py01480h1.pdf]

## Supplementary Information for

# Saturated and Stabilized White Electroluminescence with Simultaneous Three-Color Emission from a Six-Armed Star-Shaped Single-Polymer System

Yuan-Da Jiu,<sup>a,‡</sup> Cheng-Fang Liu,<sup>a,‡</sup> Jian-Yun Wang,<sup>a</sup> Wen-Yong Lai<sup>\*,a,b</sup>, Yi Jiang,<sup>a</sup> Wei-Dong Xu,<sup>a</sup>  
Xin-Wen Zhang<sup>\*,a</sup> Wei Huang<sup>\*,a,b</sup>

<sup>1</sup>Key Laboratory for Organic Electronics and Information Displays (KLOEID) & Institute of Advanced Materials (IAM), Jiangsu National Synergetic Innovation Center for Advanced Materials (SICAM), Nanjing University of Posts & Telecommunications, 9 Wenyuan Road, Nanjing 210023, China

<sup>2</sup>Key Laboratory of Flexible Electronics (KLOFE) & Institute of Advanced Materials (IAM), Jiangsu National Synergetic Innovation Center for Advanced Materials (SICAM), Nanjing Tech University (NanjingTech), 30 South Puzhu Road, Nanjing 211816, China

\*Email: iamwylai@njupt.edu.cn; iamxwzhang@njupt.edu.cn

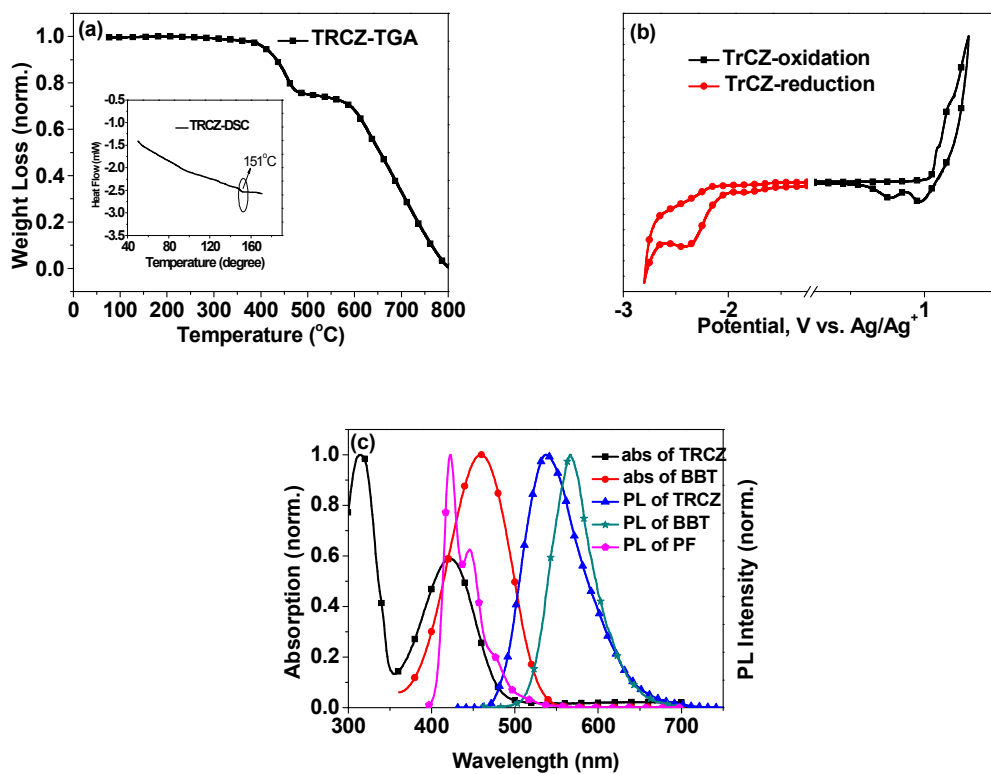

Figure S1. (a) Thermal properties of TRCZ; (b) Electrochemical properties of TRCZ; (c) The absorption spectrum of TRCZ and emission spectra of TRCZ, BBT, PF.

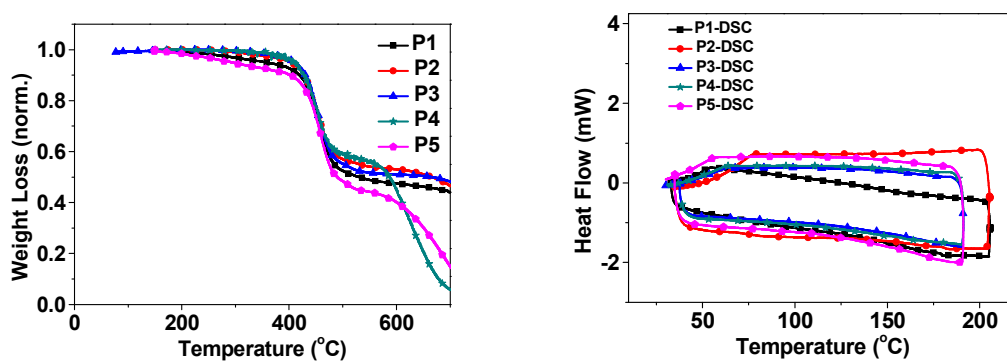

Figure S2. Thermal properties of P1-P5

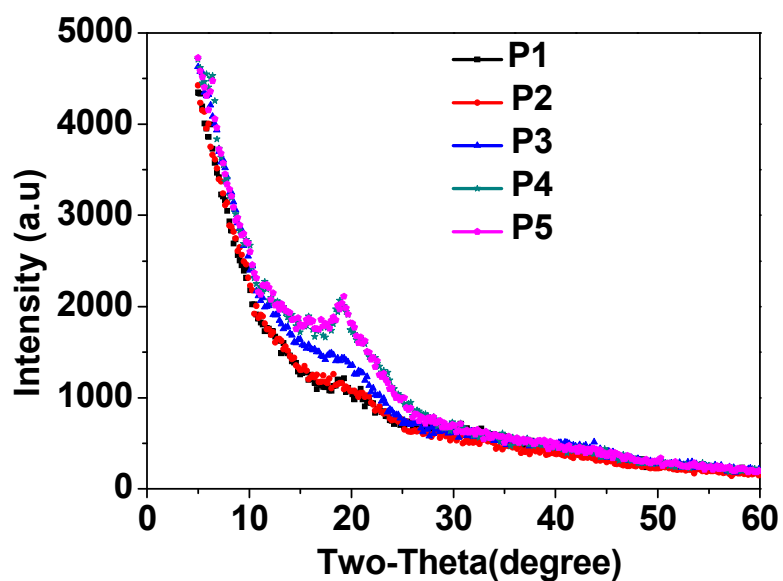

Figure S3. XRD patterns (0-60°) of P1-P5 powders ( $n = 2,3$ ). All samples were tested under the same conditions and each pattern was at its original intensity.

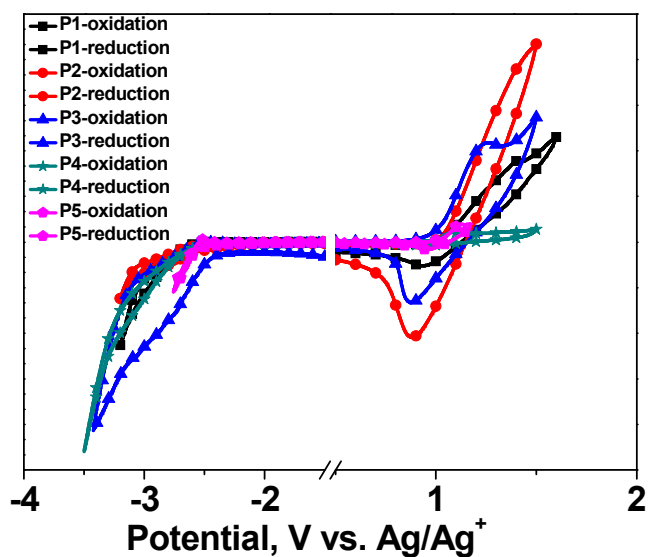

Figure S4. Electrochemical properties of P1-P5.

Table S1. Thermal and electrochemical properties of P1-P5.

| Compounds | $T_g$ (°C) | $T_d$ (°C) | $E_{\text{onset}}$ | $E_{\text{red}}$ | $E_{\text{HOMO}}$ | $E_{\text{LUMO}}$ | $E_g$ |
|-----------|------------|------------|--------------------|------------------|-------------------|-------------------|-------|
| P1        | -          | 402        | 1.04               | -2.60            | -5.80             | -2.09             | 3.71  |
| P2        | -          | 371        | 1.03               | -2.57            | -5.80             | -2.11             | 3.70  |
| P3        | -          | 364        | 1.01               | -2.44            | -5.80             | -2.13             | 3.67  |
| P4        | -          | 390        | 0.98               | -2.44            | -5.80             | -2.18             | 3.62  |
| P5        | -          | 377        | 1.03               | -2.56            | -5.81             | -2.11             | 3.69  |

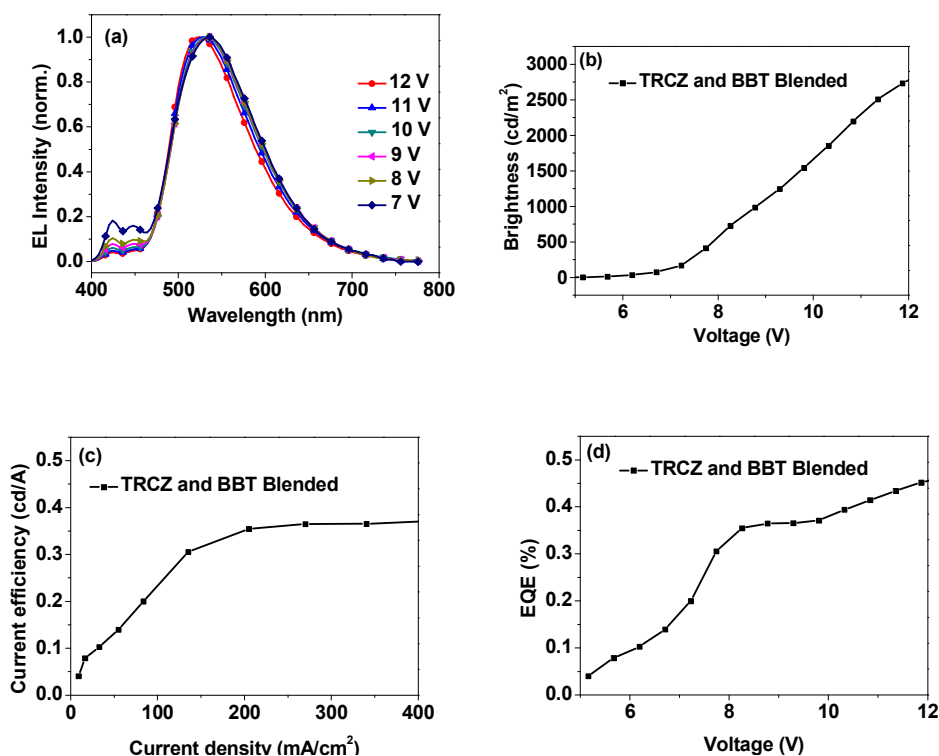

Figure S5. EL characteristics of TRCZ and BBT blended PF with the configuration of ITO/PEDOT: PSS/TRCZ and BBT blended in PFB/TPBI/LiF/Al. (a) EL spectrum with different voltages; (b) Brightness-voltage characteristics; (c) Current efficiency-density characteristics; (d) EQE-voltage characteristics.

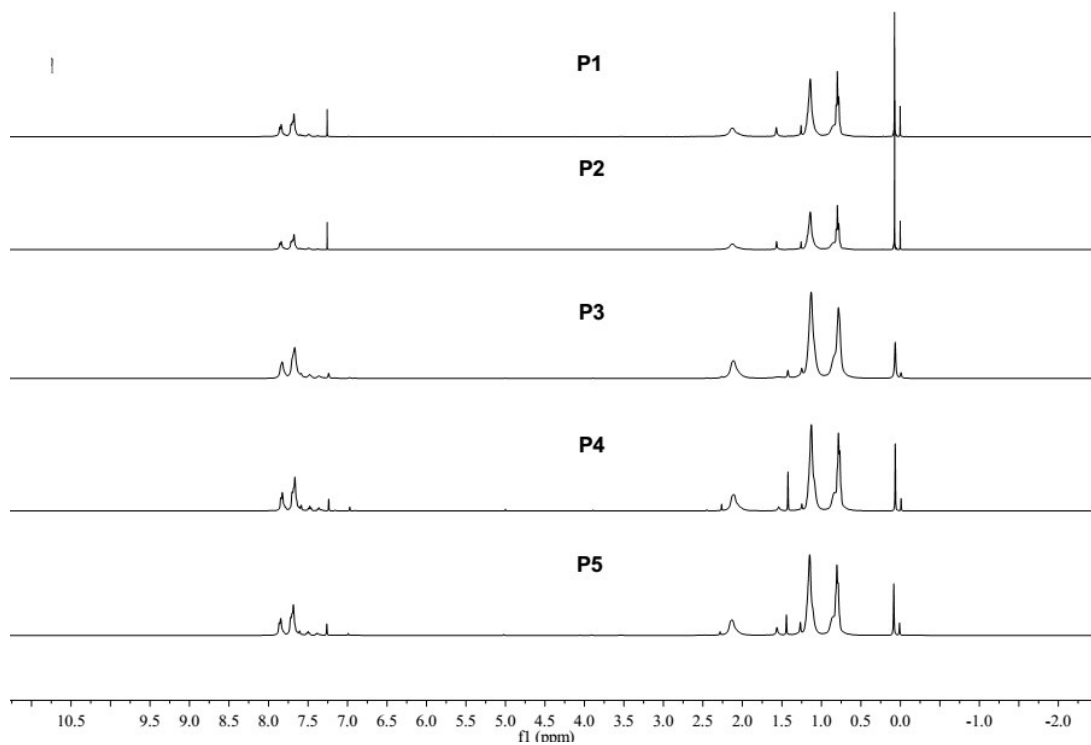

Figure S6.  $^1\text{H}$  NMR spectra of P1-P5.

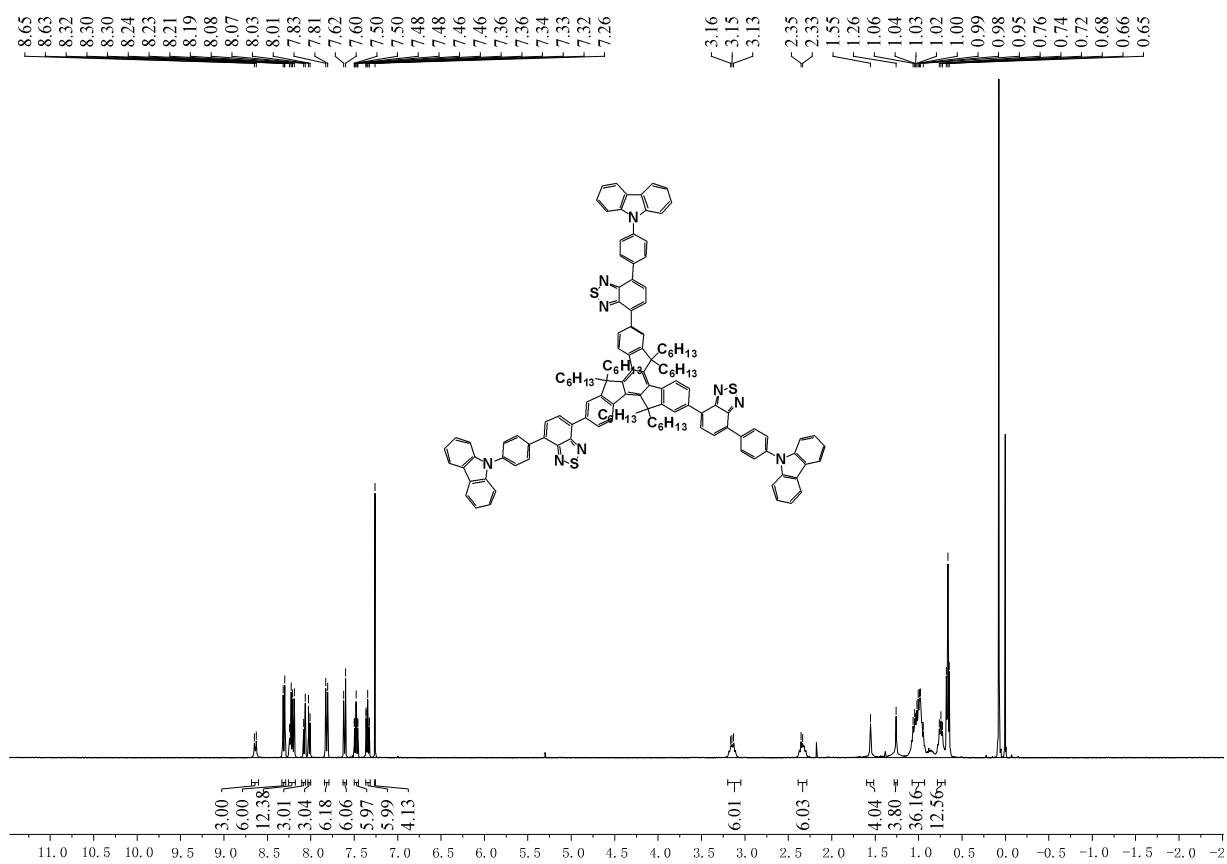

Figure S7.  $^1\text{H}$  NMR spectra of TRCZ in  $\text{CDCl}_3$ .

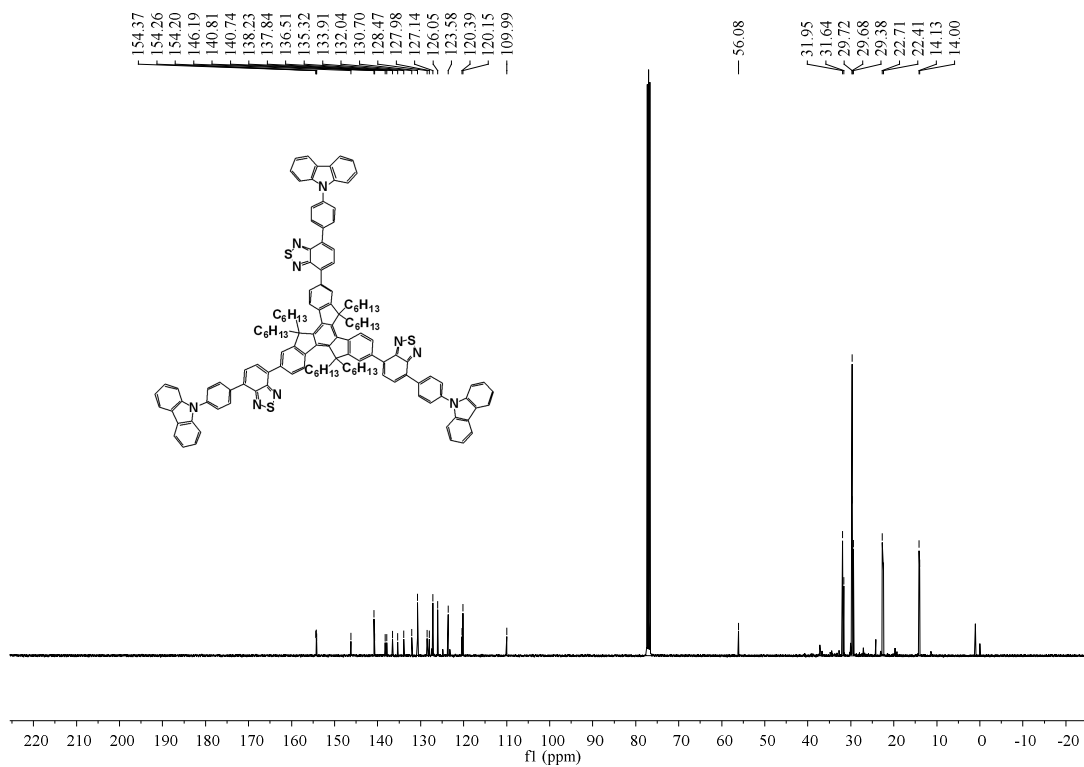

Figure S8.  $^{13}\text{C}$  NMR spectra of TRCZ in  $\text{CDCl}_3$ .

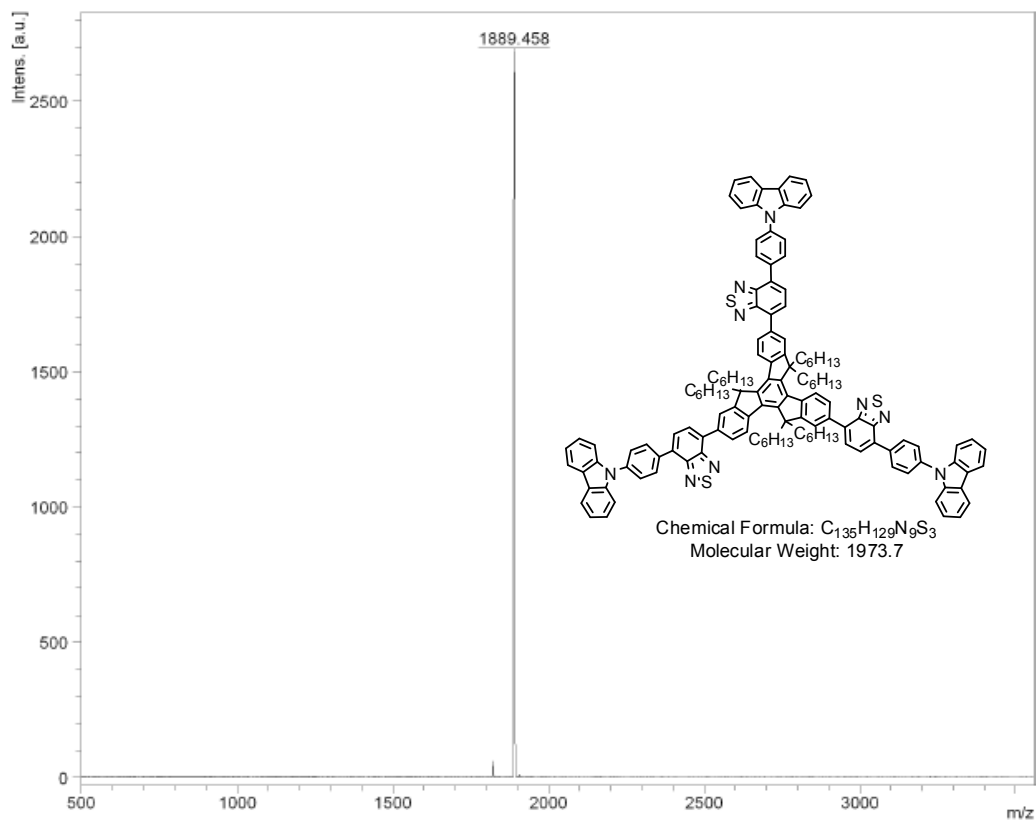

Figure S9. MALDI-TOF mass spectra of TRCZ.

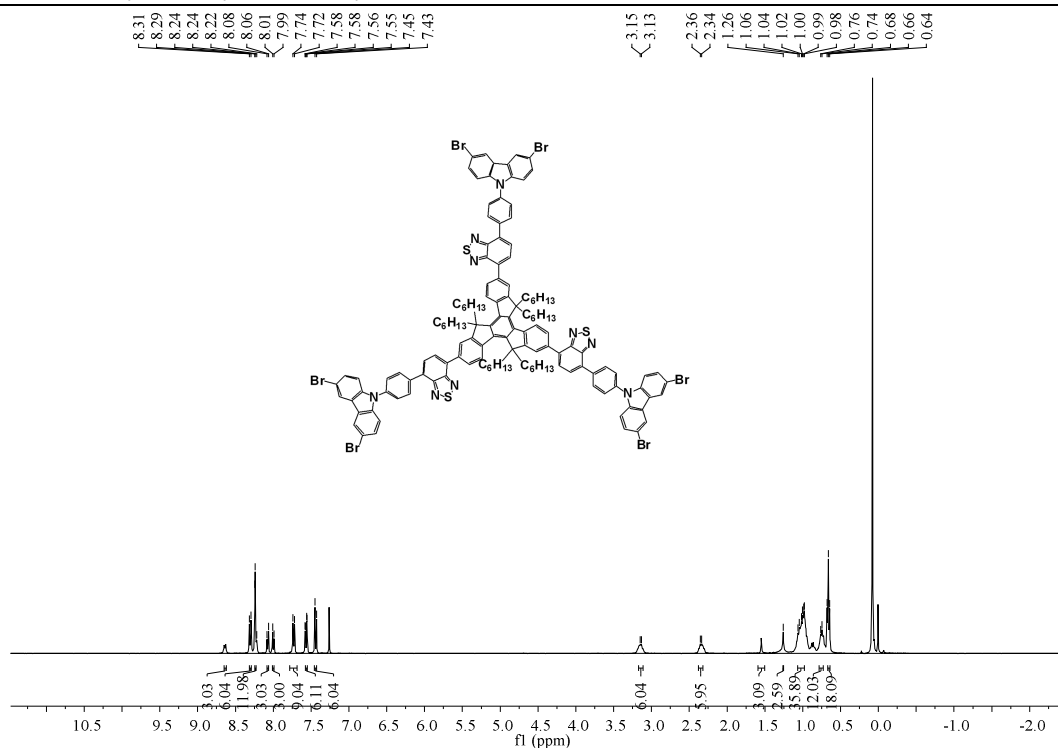

Figure S10. <sup>1</sup>H NMR spectra of TRCZ6Br in CDCl<sub>3</sub>.

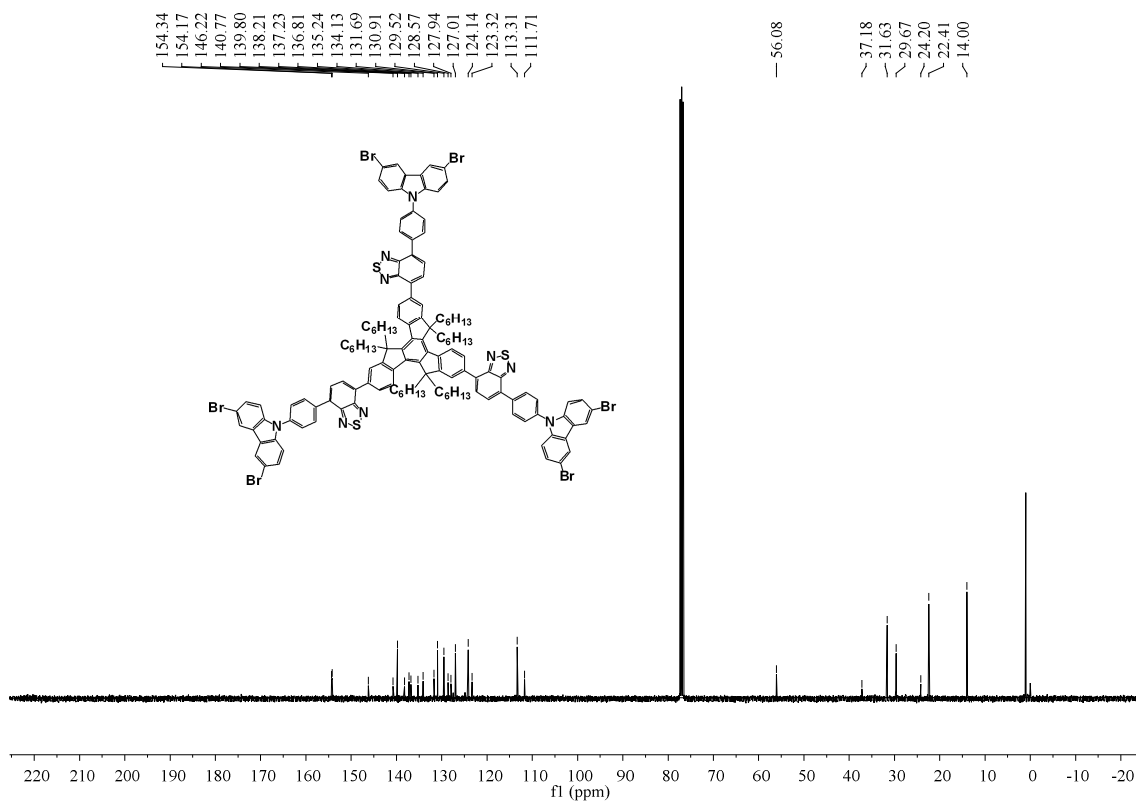

Figure S11. <sup>13</sup>C NMR spectra of TRCZ6Br in CDCl<sub>3</sub>.

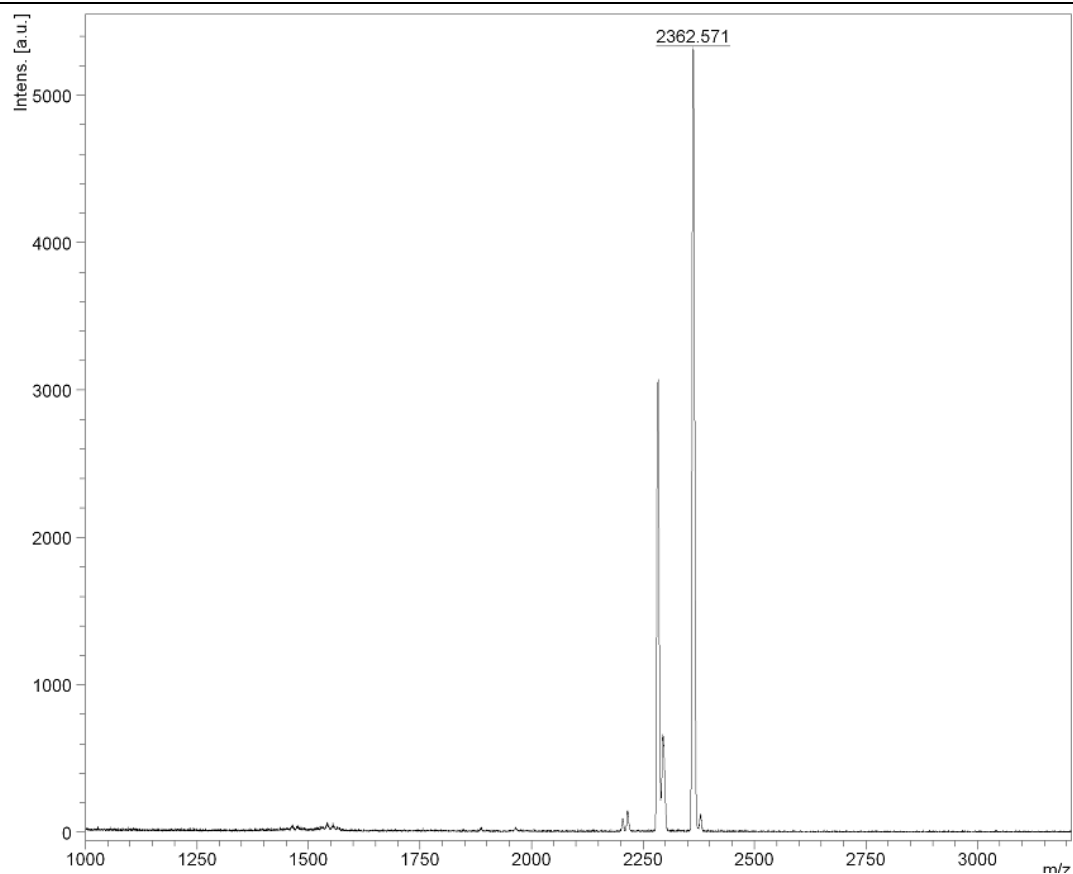

**Figure S12.** MALDI-TOF mass spectra of **TRCZ6Br**.

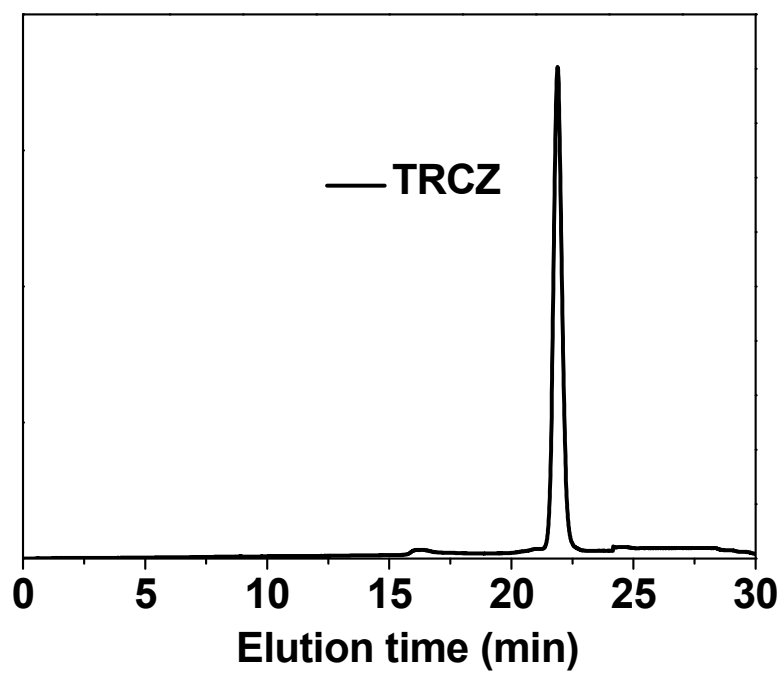

**Figure S13.** GPC elution curve for **TRCZ**



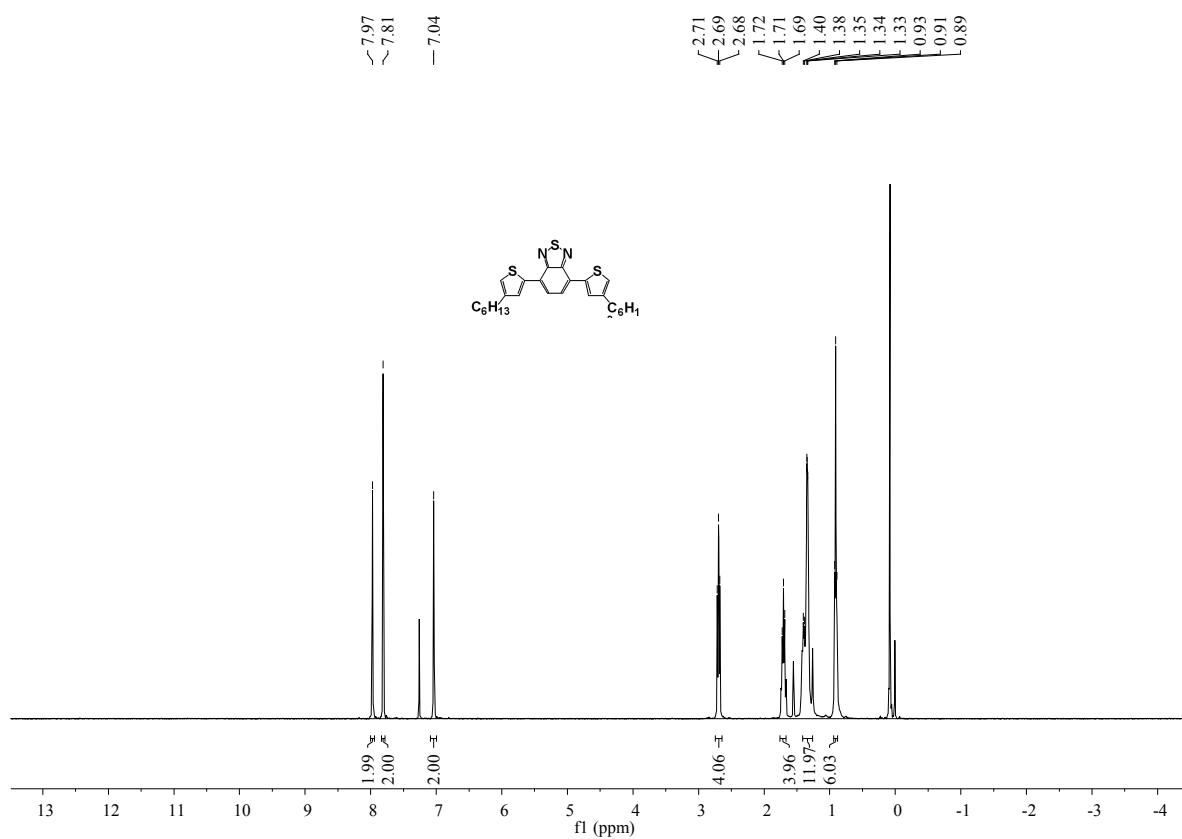

Figure S14.  $^1\text{H}$  NMR spectra of BBT in  $\text{CDCl}_3$ .

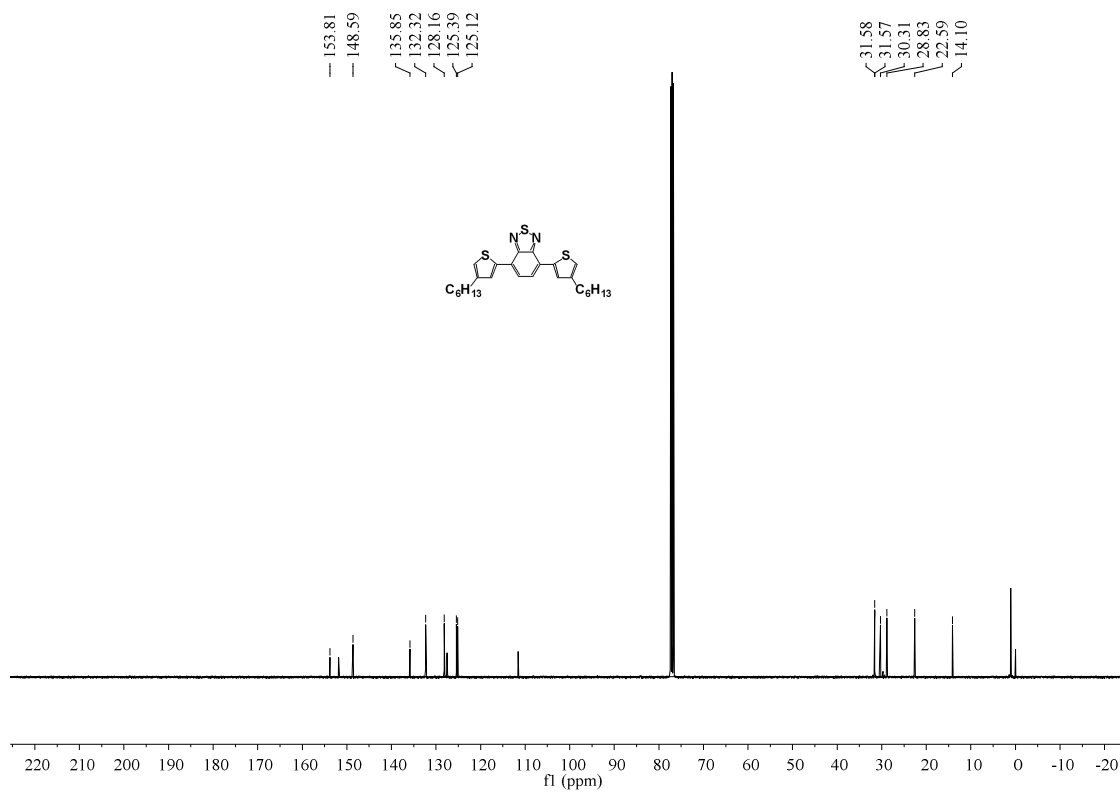

Figure S15.  $^{13}\text{C}$  NMR spectra of BBT in  $\text{CDCl}_3$ .

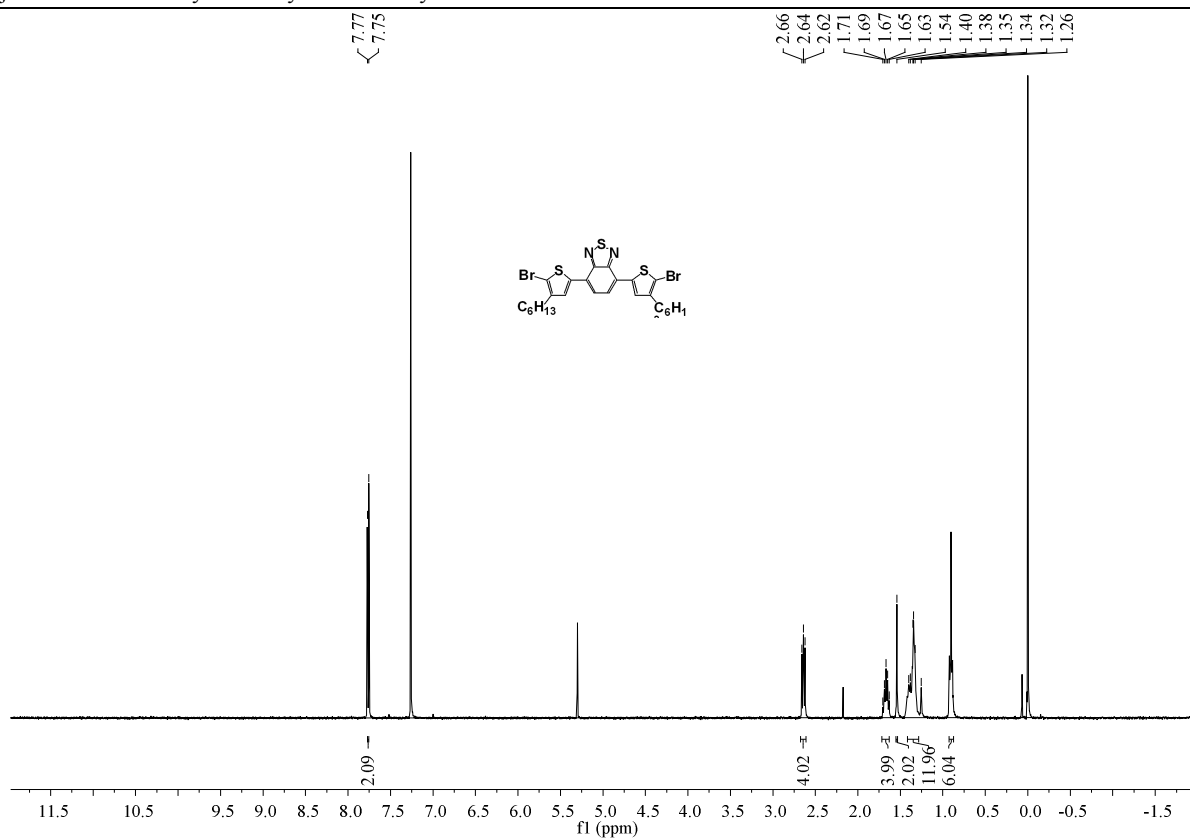

Figure S16.  $^1\text{H}$  NMR spectra of BBT2Br in  $\text{CDCl}_3$ .

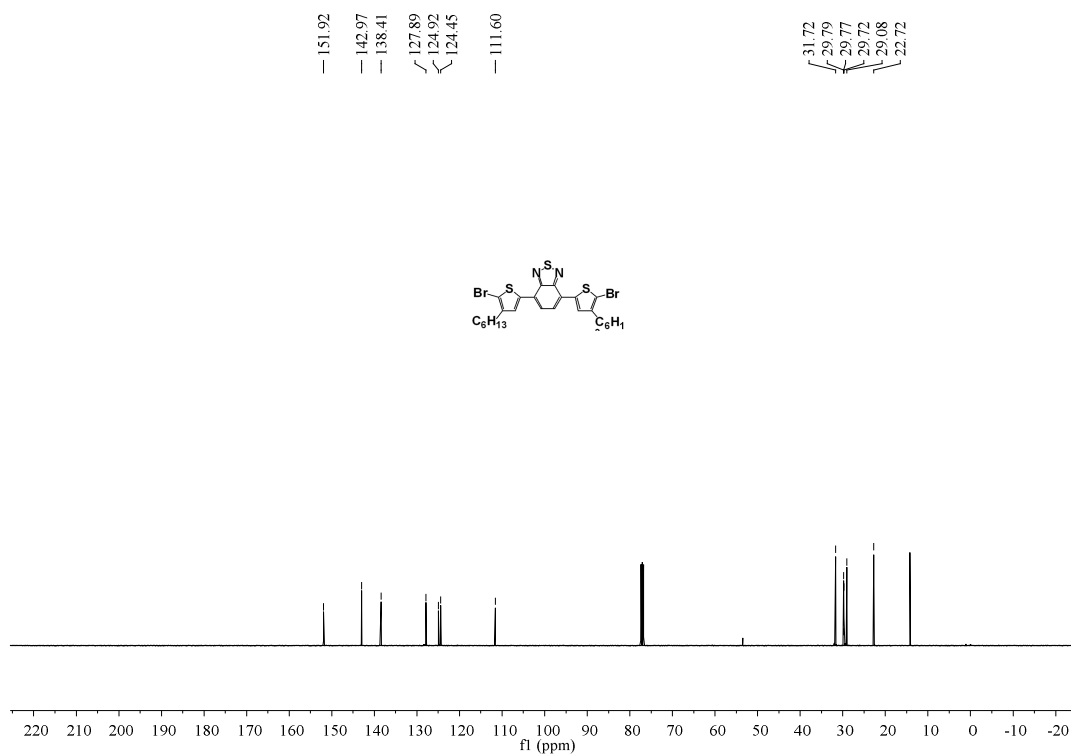

Figure S17.  $^{13}\text{C}$  NMR spectra of BBT2Br in  $\text{CDCl}_3$ .

Comment 2

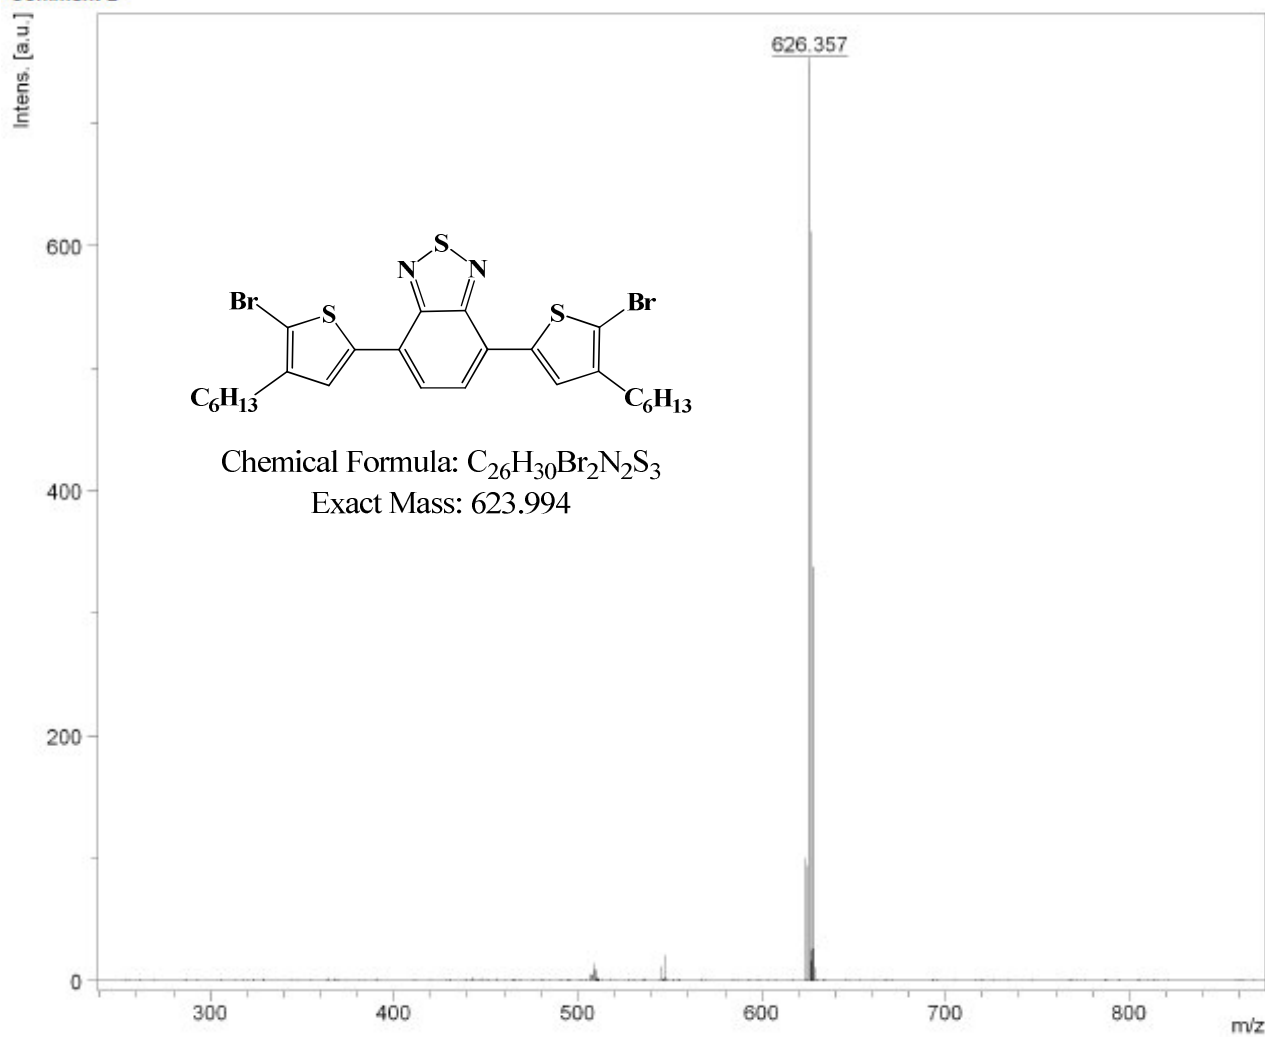

**Figure S18.** MALDI-TOF mass spectra of **BBT2Br**.
